# Supplementary material for: Disclosing the behavior under hydrostatic pressure of rhombohedral MgIn2Se4by means of first-principles calculations
Source: Royal Society of Chemistry journal article supplement (doi:10.1039/d0cp02842h), 2020-01-01
Supplement: d0cp02842h1.pdf [file d0cp02842h1.pdf]

## Supporting Information

# Disclosing the behavior under hydrostatic pressure of rhombohedral $\text{MgIn}_2\text{Se}_4$ by means of first-principles calculations

Khaled Boukri<sup>a</sup>, Tarik Ouahrani <sup>a,b,\*</sup>, Michael Badawi<sup>c</sup>, Kamel Demmouche<sup>d</sup>, Ruth Franco<sup>e</sup> and J. Manuel Recio<sup>e,\*</sup>

*Received Xth XXXXXXXXXXXX 20XX, Accepted Xth XXXXXXXXXXXX 20XX*

*First published on the web Xth XXXXXXXXXXXX 200X*

DOI: 10.1039/b000000x

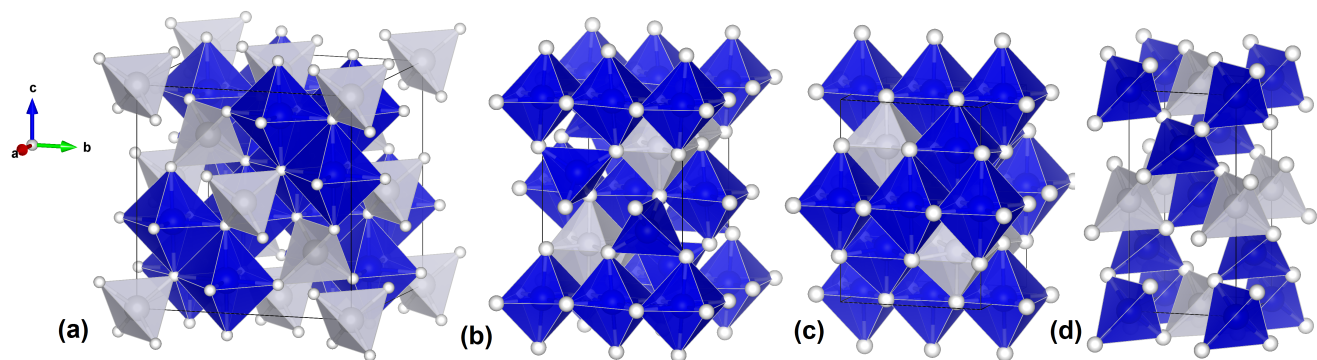

**Fig. 1** Polyhedral views of (a) direct spinel, (b) inverse spinel, (c)  $\text{LiTiO}_2$ -type, and (d)  $\bar{I}4$  polymorphs of  $\text{MgIn}_2\text{Se}_4$ .

<sup>a</sup> *Laboratoire de Physique Théorique, Université de Tlemcen 13000 Algeria. Tel:+21343201824; E-mail: tarik\_ouahrani@yahoo.fr*

<sup>b</sup> *École supérieure en sciences appliquées, B.P. 165, Tlemcen 13000, Algeria.*

<sup>c</sup> *Université de Lorraine and CNRS, LPCT, UMR 7019, 54506 Vandoeuvre-lés-Nancy, France*

<sup>d</sup> *Institut des Sciences, Centre Universitaire -Belhadj Bouchaib- Ain Temouchent, B.P. 284, 46000 Ain Temouchent, Algeria*

<sup>e</sup> *MALTA-Consolider Team and Departamento de Química Física y Analítica, Universidad de Oviedo, E-33006 Oviedo Spain*

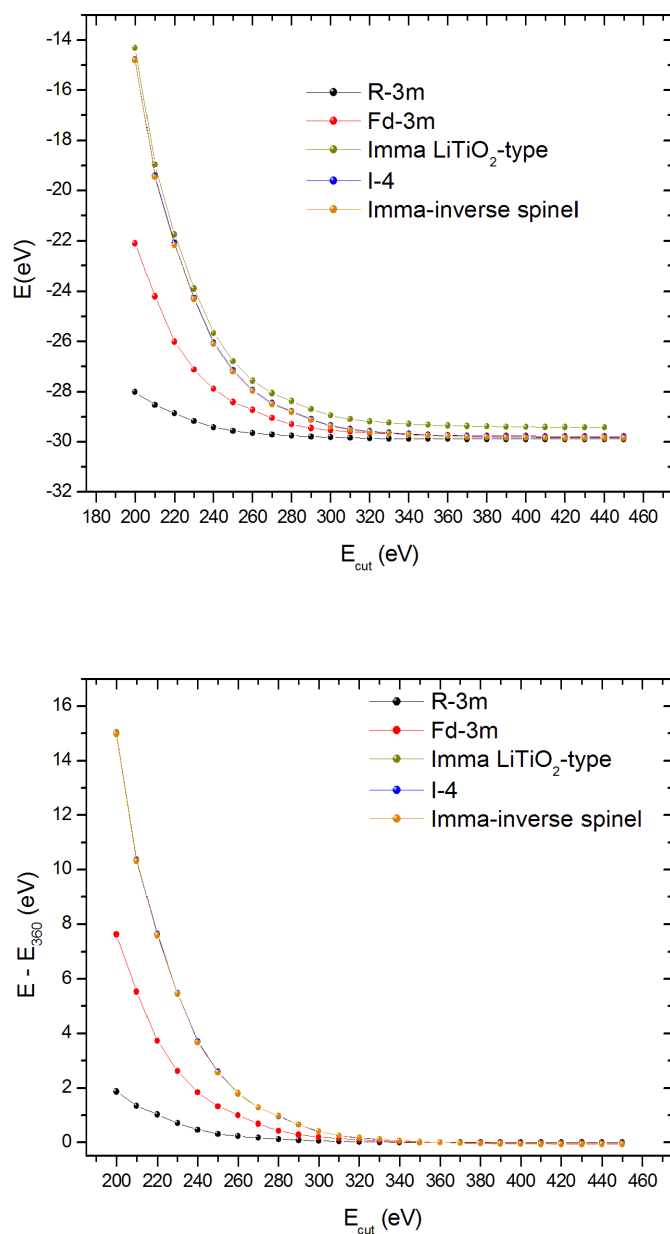

**Fig. 2** Test of energy convergence with the plane wave kinetic energy cutoff ( $E_{\text{cut}}$ ). (Top) Total energy ( $E$ ) and (bottom) relative total energy ( $E - E_{360}$ ) versus  $E_{\text{cut}}$  for the five  $\text{MgIn}_2\text{Se}_4$  polymorphs explored in this work.  $E_{360}$  is the energy when  $E_{\text{cut}} = 360$  eV for each polymorph.

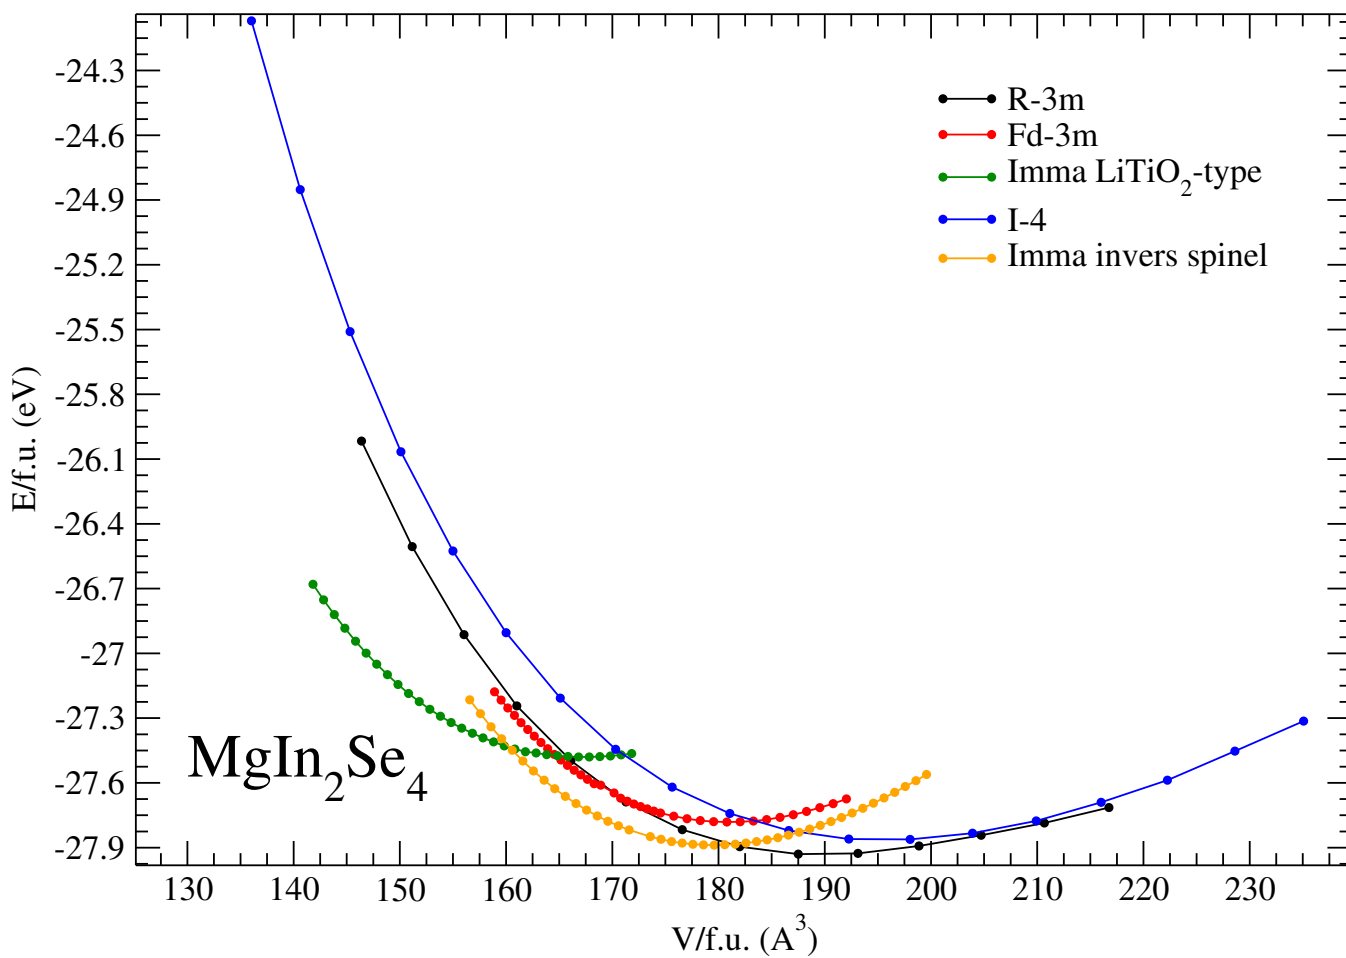

**Fig. 3** Volume dependence of the electronic energy of  $\text{MgIn}_2\text{Se}_4$  according to GGA-PBE+D3 calculations for the  $R\bar{3}m$ (a), *Imma* inverse spinel(b),  $Fd\bar{3}m$ (c), *Imma*  $\text{LiTiO}_2$ -type(d), and  $I\bar{4}$ (e), structures. Symbols stand for the calculated values, whereas lines are a guide to the eye. All values for formula unit.

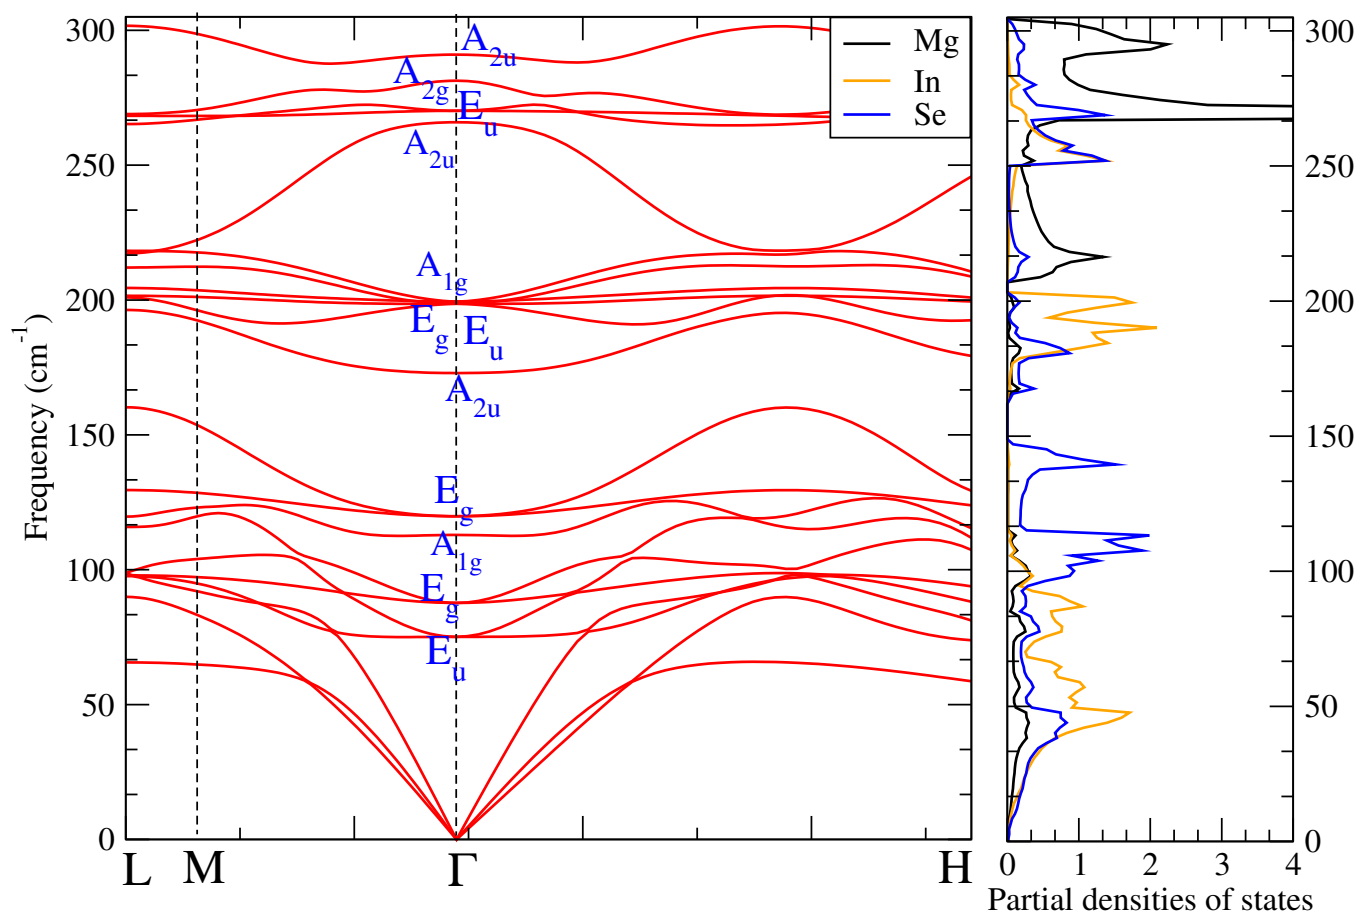

**Fig. 4** Phonon dispersion curves calculated at GGA-PBE+D3 level for the  $R\bar{3}m$  phase at zero pressure.

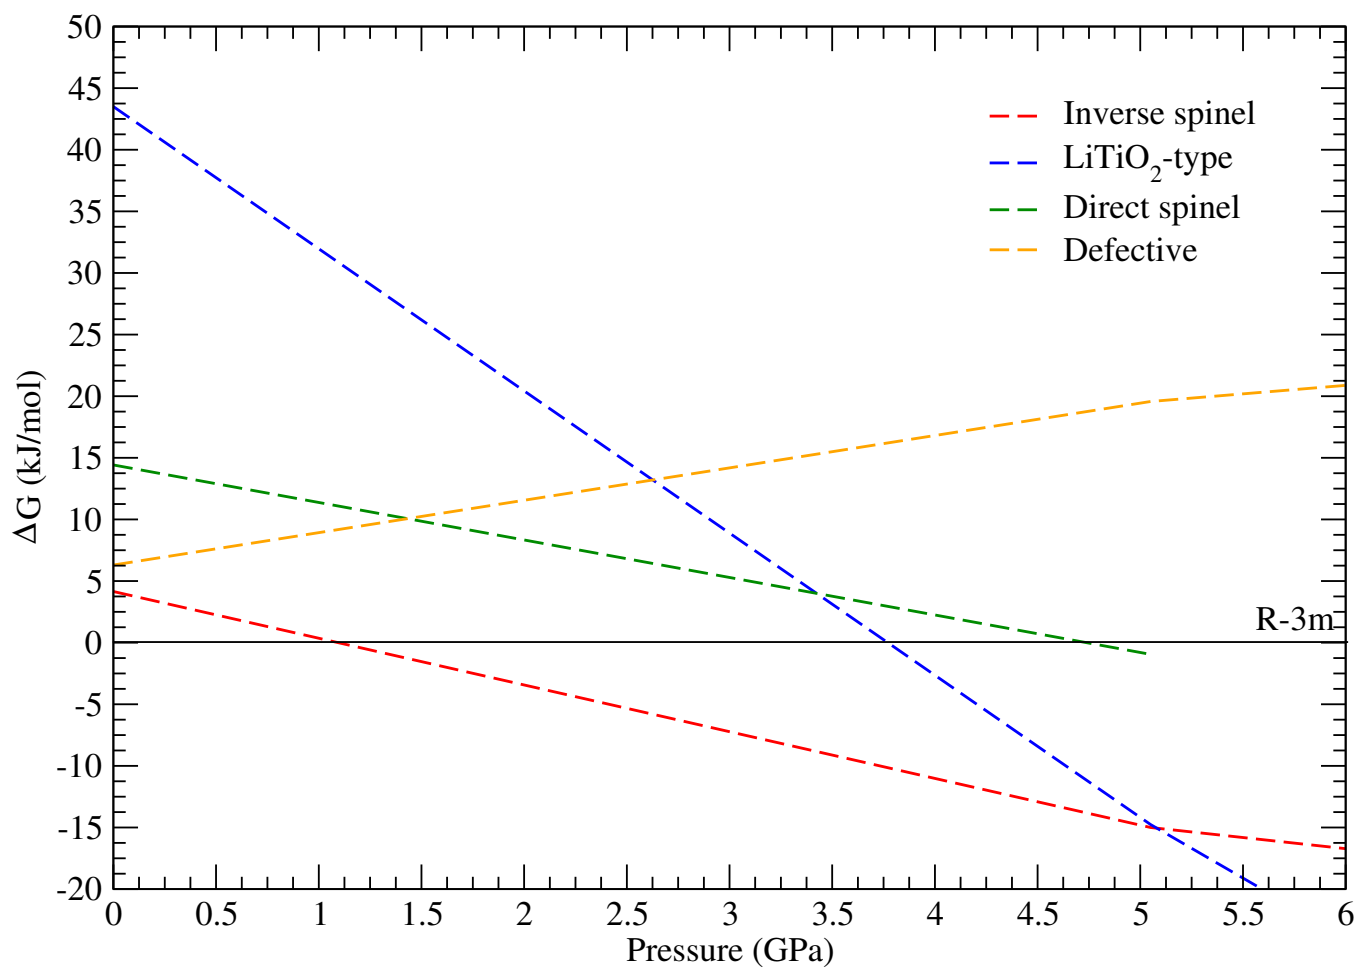

**Fig. 5** Pressure dependence of the Gibbs energy at GGA-PBE+D3 level at static conditions.

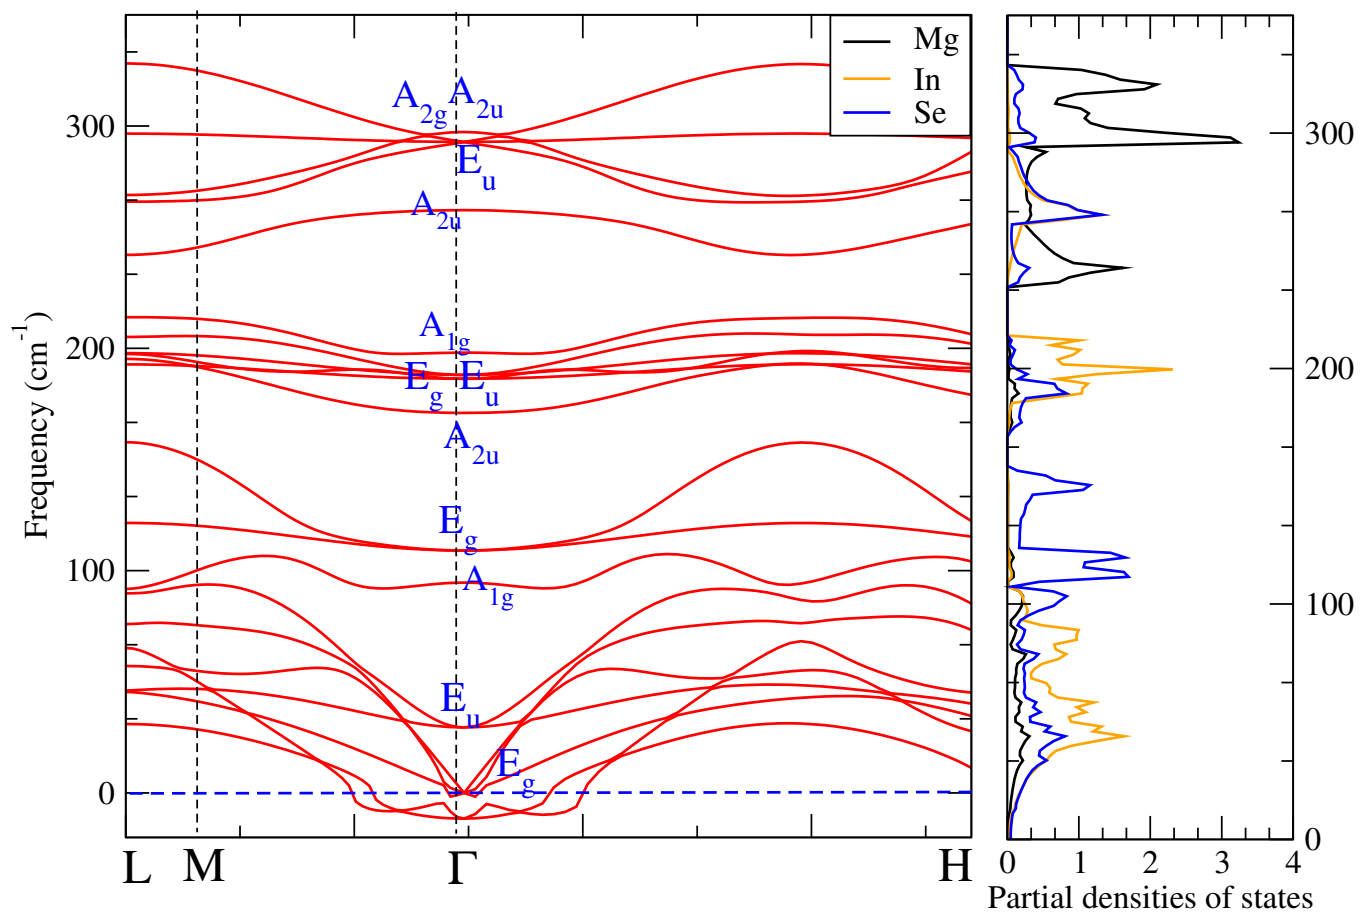

**Fig. 6** Phonon dispersion curves calculated at GGA-PBE+D3 level for the  $R\bar{3}m$  phase at 1.5 GPa.

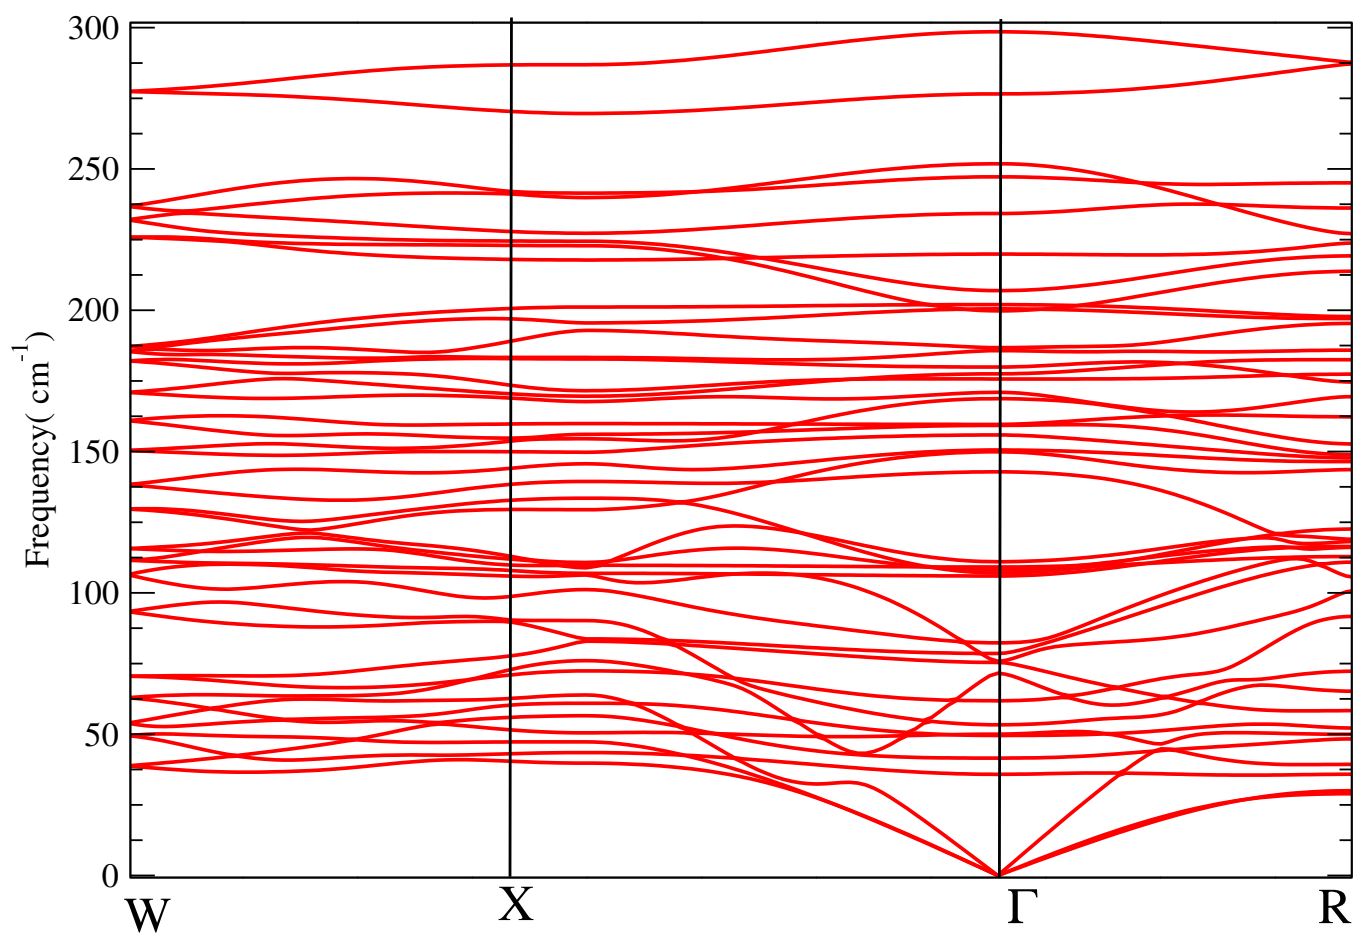

**Fig. 7** Phonon dispersion curves calculated at GGA-PBE+D3 level for the inverse spinel phase at 2.5 GPa.



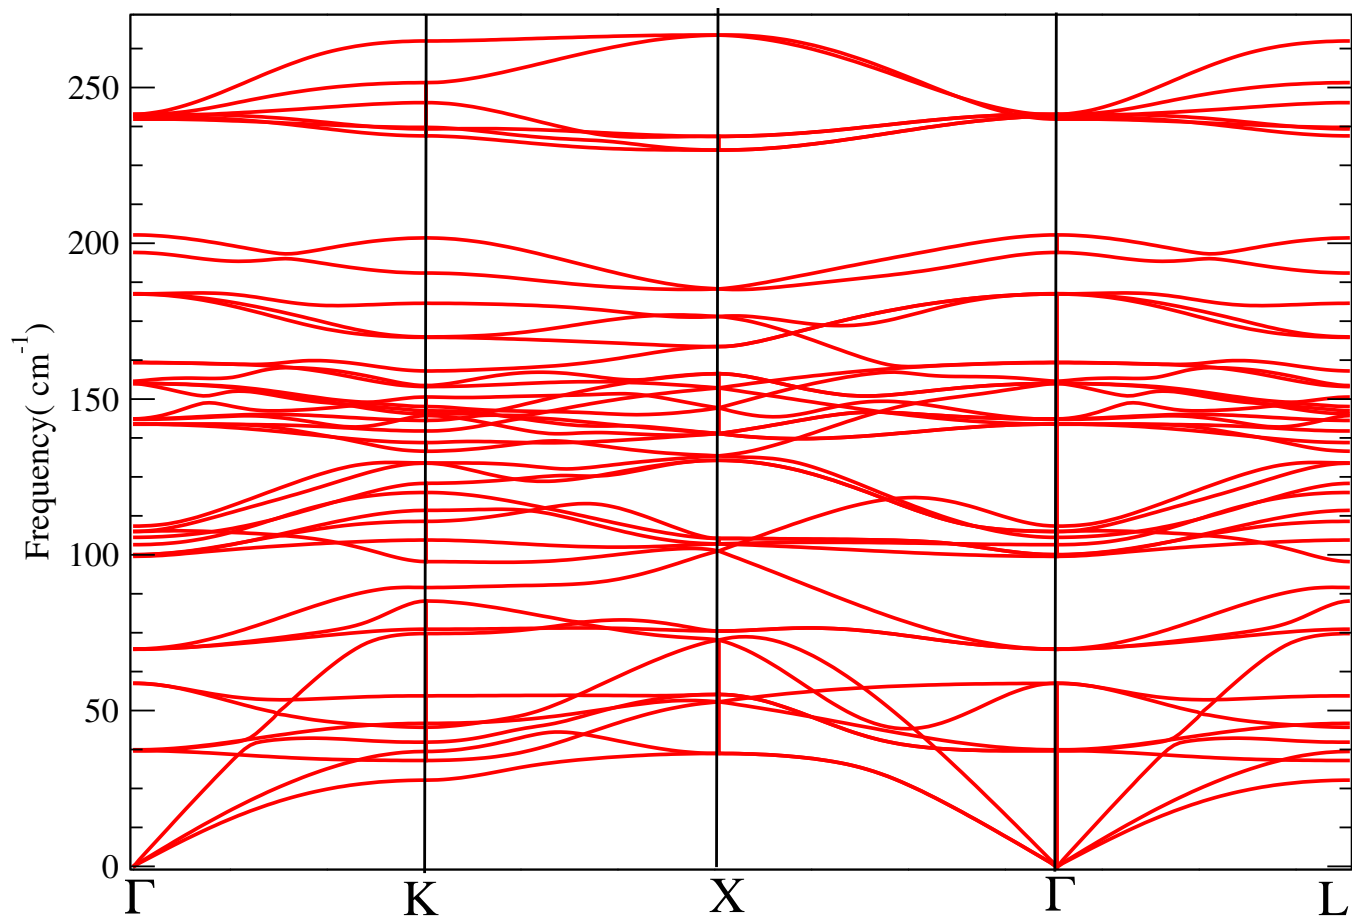

**Fig. 8** Phonon dispersion curves calculated at GGA-PBE+D3 level for the direct spinel phase at 5 GPa.

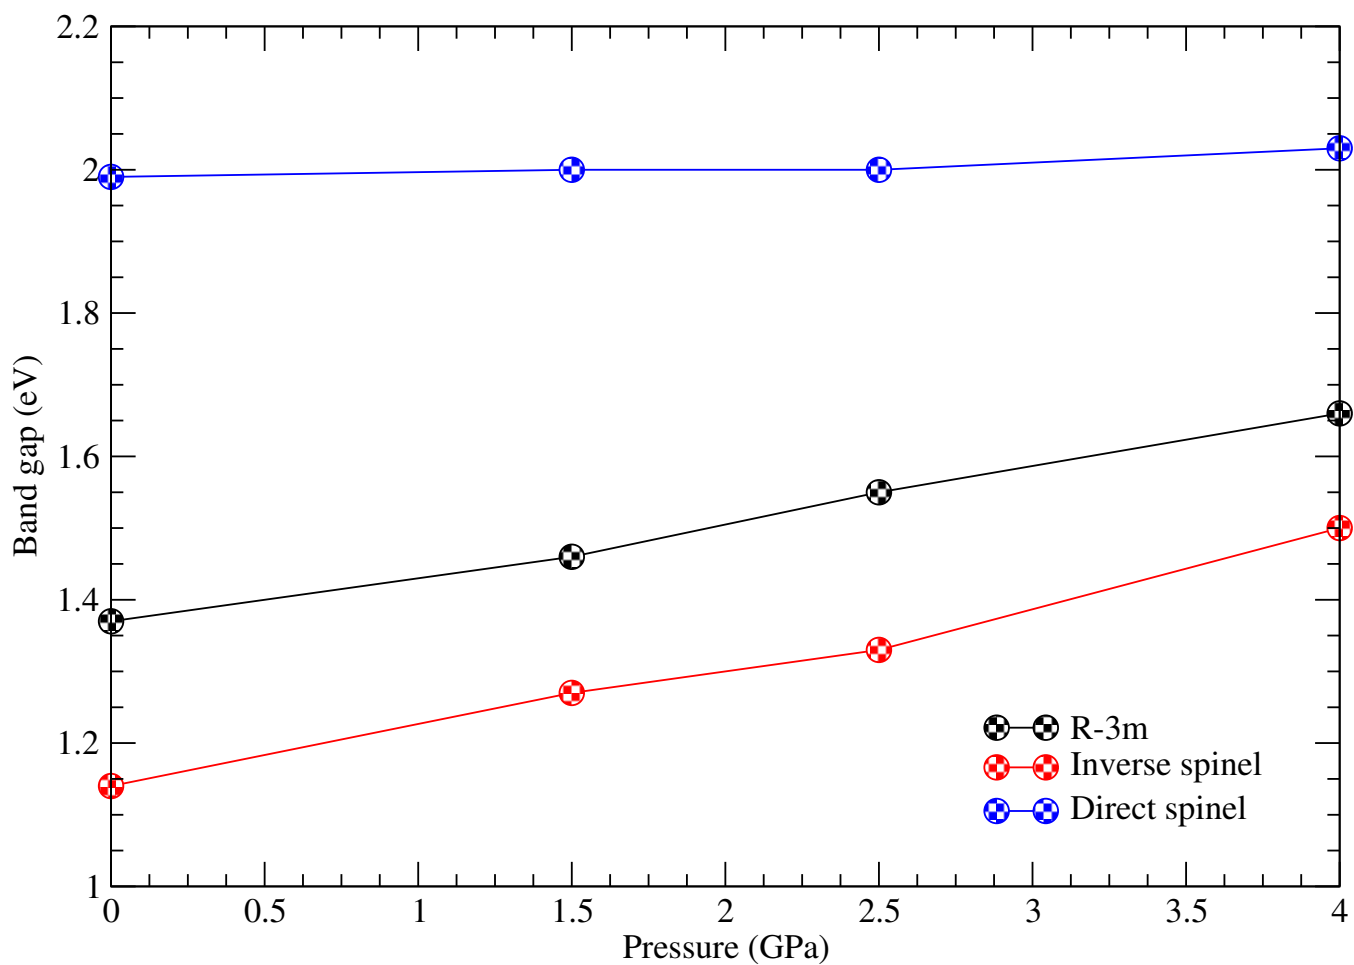

**Fig. 9** Pressure evolution of the band gap of the  $R\bar{3}m$ , Inverse and direct spinel polymorphs according to our calculations using the hybrid HSE06 functional.

**Table 1** Crystallographic coordinates of atoms in the five polymorphs of  $\text{MgIn}_2\text{Se}_4$  explored in this work. The space group, symmetry multiplicity, and the number of formula units ( $Z$ ) are given.

| Atom                                               | Wyckoff position | $x$     | $y$      | $z$     |
|----------------------------------------------------|------------------|---------|----------|---------|
| Rhombohedral ( $R\bar{3}m$ ), $Z = 3$              |                  |         |          |         |
| LDA+D3                                             |                  |         |          |         |
| In1                                                | 6c               | 0.00000 | 0.00000  | 0.23524 |
| Se1                                                | 6c               | 0.00000 | 0.00000  | 0.12966 |
| Se2                                                | 6c               | 0.00000 | 0.00000  | 0.29935 |
| GGA-PBE+D3                                         |                  |         |          |         |
| In1                                                | 6c               | 0.00000 | 0.00000  | 0.23709 |
| Se1                                                | 6c               | 0.00000 | 0.00000  | 0.12673 |
| Se2                                                | 6c               | 0.00000 | 0.00000  | 0.30002 |
| Inverse spinel ( $Im\bar{m}a$ ), $Z = 4$           |                  |         |          |         |
| LDA+D3                                             |                  |         |          |         |
| In2                                                | 4e               | 0.00000 | 0.25000  | 0.13398 |
| Se1                                                | 8h               | 0.00000 | 0.02542  | 0.74334 |
| Se2                                                | 8i               | 0.23719 | 0.25000  | 0.50907 |
| GGA-PBE+D3                                         |                  |         |          |         |
| In2                                                | 4e               | 0.00000 | 0.25000  | 0.13362 |
| Se1                                                | 8h               | 0.00000 | 0.02518  | 0.74339 |
| Se2                                                | 8i               | 0.23721 | 0.25000  | 0.50946 |
| Direct spinel ( $Fd\bar{3}m$ ), $Z = 8$            |                  |         |          |         |
| LDA+D3                                             |                  |         |          |         |
| Se1                                                | 32e              | 0.75692 | 0.75692  | 0.75692 |
| GGA-PBE+D3                                         |                  |         |          |         |
| Se1                                                | 32e              | 0.75654 | 0.75654  | 0.75654 |
| LiTiO <sub>2</sub> -type ( $Im\bar{m}a$ ), $Z = 4$ |                  |         |          |         |
| LDA+D3                                             |                  |         |          |         |
| Se1                                                | 8h               | 0.00000 | -0.00783 | 0.74285 |
| Se2                                                | 8i               | 0.25354 | 0.25000  | 0.50167 |
| GGA-PBE+D3                                         |                  |         |          |         |
| Se1                                                | 8h               | 0.00000 | -0.00642 | 0.74352 |
| Se2                                                | 8i               | 0.25326 | 0.25000  | 0.50175 |
| Defective ( $I\bar{4}$ ), $Z = 2$                  |                  |         |          |         |
| LDA+D3                                             |                  |         |          |         |
| Se                                                 | 1 8g             | 0.21618 | 0.72006  | 0.36085 |
| GGA-PBE+D3                                         |                  |         |          |         |
| Se1                                                | 8g               | 0.21593 | 0.72217  | 0.36193 |
